# Supplementary material for: Participatory video as a tool for co-management in coastal communities: a case study from Madagascar
Source: Frontiers journal article supplement (doi:10.3389/fhumd.2023.1266066), 2023-11-09
Supplement: Table_1.DOCX [file Table_1.DOCX]

Table S1. Codes and parent codes emerging from interviews from four participatory video workshop in four villages in southwest Madagascar (Ambatomilo, Andavadoaka, Tampolove, Ampasilava)

| **Code** | **Parent Code** |
| --- | --- |
| Decreasing marine resources; weight of catch; used to fish close to shore; species seen less/no longer seen; no catch/smaller catch; fished moved away/ moved deeper | Changing marine ecosystem/ fisheries |
| Improved fishing technology; increase in fishing gear; using destructive/prohibited fishing techniques; arrival of fish collectors; new generation catch more; increase in population; up to God; habitat destroyed; children starting fishing younger; small net mesh size; catching small fish; theft from reserves; creation of reserves; diving at night; sound of engines | Drivers of change |
| Life is difficult; go further/ deeper to fish and glean; not enough food; look for other livelihoods | Consequences of change |
| Seaweed farming; seaweed disease; sea cucumber aquaculture; agricultural farming; difficult to farm now (agricultural) | Alternative livelihoods |
| A reserve to recover fisheries; education; stop destructive fishing; alternative jobs; up to the new generation; reduce number of people fishing | Solutions |
| Less rain; seasons shifted | Climate/ weather |
| Origin of the village; fishing techniques of the past; traditional ceremonies/ rituals; sharing food; taboo areas | Traditions and history |
